# Supplementary material for: Influence of Root Diameter and Soil Depth on the Xylem Anatomy of Fine- to Medium-Sized Roots of Mature Beech Trees in the Top- and Subsoil
Source: PubMed Central journal article supplement (PMC5522885; doi:10.3389/fpls.2017.01194), 2017-07-24
Supplement: Data_Sheet_1.pdf [file Data_Sheet_1.pdf]

## *Supplementary Material*

### **Influence of root diameter and soil depth on the xylem anatomy of fine- to medium-sized roots of mature beech trees in the top- and subsoil**

Kristina Kirfel, Christoph Leuschner, Dietrich Hertel, Bernhard Schuldt\*

\*Correspondence: bernhard.schuldt@plant-ecology.de

**Table S1:** Root classification according to diameter after Sutton and Tinus (1983) and number of observations (n) per root class and soil depth (cm) across the three excavated soil pits.

| Root diameter | Classification       | Soil depth (cm) |         |         |         |          |           |           |
|---------------|----------------------|-----------------|---------|---------|---------|----------|-----------|-----------|
|               |                      | 0 - 20          | 20 - 40 | 40 - 60 | 60 - 80 | 80 - 120 | 120 - 160 | 160 - 200 |
| Ø 1-5 mm      | fine and small roots | 16              | 15      | 15      | 19      | 18       | 18        | 19        |
| Ø 5-10 mm     | medium roots         | 14              | 11      | 13      | 7       | 10       | 11        | 11        |
| Ø 1-2 mm      |                      | 2               | 4       | 0       | 4       | 4        | 5         | 1         |
| Ø 2-3 mm      |                      | 7               | 3       | 9       | 6       | 9        | 6         | 7         |
| Ø 3-4 mm      |                      | 3               | 3       | 4       | 7       | 3        | 4         | 7         |
| Ø 4-5 mm      |                      | 4               | 5       | 2       | 2       | 4        | 3         | 4         |
| Ø 5-6 mm      |                      | 4               | 1       | 5       | 5       | 4        | 4         | 2         |
| Ø 6-7 mm      |                      | 1               | 5       | 4       | 0       | 2        | 1         | 3         |
| Ø 7-8 mm      |                      | 4               | 4       | 0       | 1       | 1        | 0         | 3         |
| Ø 8-9 mm      |                      | 5               | 1       | 2       | 0       | 0        | 3         | 1         |
| Ø 9-10 mm     |                      | 0               | 0       | 2       | 1       | 1        | 3         | 2         |

**Table S2:** Physical and chemical soil characteristics at different soil depths in the Grinderwald forest (June 2013). Classification of soil horizons according to FAO - WRB 2014.

| Soil depth (cm) | Soil horizon | pH (CaCl <sub>2</sub> ) | SOC (g kg <sup>-1</sup> ) | Sand (%) | Silt (%) | Clay (%) |
|-----------------|--------------|-------------------------|---------------------------|----------|----------|----------|
| 0-2             | AE           | 3.3                     | 27.0                      | 70.0     | 26.0     | 4.0      |
| 2-12            | Bsw          | 3.4                     | 17.0                      | 65.0     | 30.0     | 5.0      |
| 12-36           | Bw           | 4.4                     | 7.0                       | 67.0     | 29.0     | 4.0      |
| 36-65           | BwC          | 4.5                     | 3.0                       | 73.0     | 24.0     | 3.0      |
| 65-125          | C            | 4.4                     | 0.4                       | 95.0     | 4.0      | 1.0      |
| 125-150         | 2C           | 4.1                     | 0.1                       | 81.0     | 11.0     | 8.0      |
| 150-180         | 2Cg          | 4.2                     | 0.8                       | 72.0     | 19.0     | 9.0      |
| 180+            | 3C           | 4.2                     | <0.1                      | 95.0     | 4.0      | 1.0      |

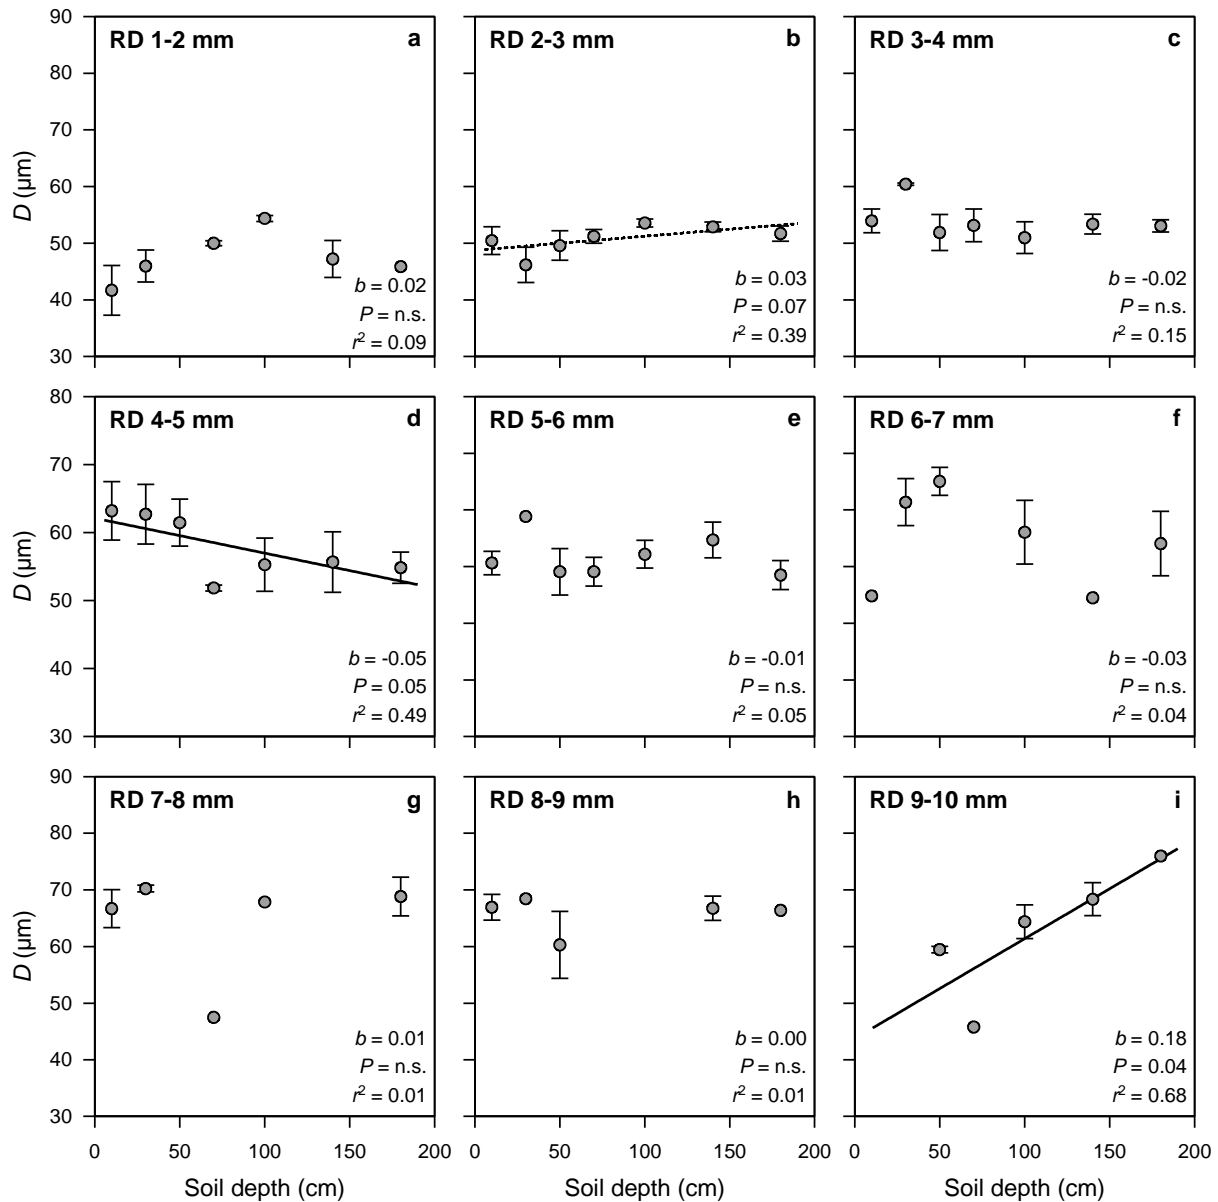

**Figure S1:** Influence of soil depth on mean vessel diameter ( $D$ ) for nine different root diameter classes (RD). For each root diameter class, 9-44 samples were available, which subsequently were averaged for each soil depth class. For number of replicates per root diameter class see Table S1. Values are means  $\pm$  SE; the slope ( $b$ ), coefficient of determination ( $r^2$ ) and probability of error ( $P$ -value) of the linear regressions are given.

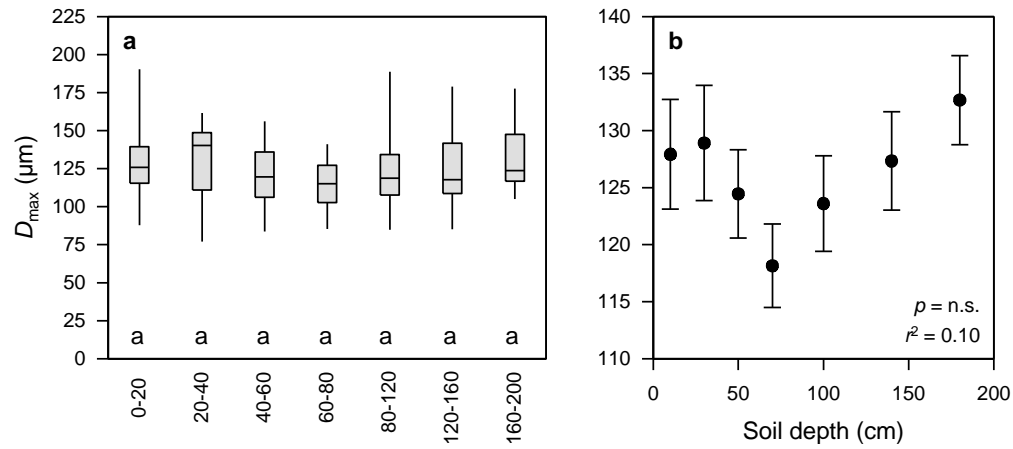

**Figure S2:** Box-whisker plots (with median, 25 and 75% quantiles and extreme values) for the variation in maximum vessel diameter ( $D_{\max}$ ) in seven soil depth classes (a); small letters indicate significant differences between depth classes. Additionally given is the relation between soil depth and mean values  $\pm$  SE for  $D_{\max}$  (b). Please note the different scaling of the y-axis.
